# Supplementary material
Source: publisher figshare collection journal article supplement (https://future-science-group.figshare.com/ndownloader/files/34891941)
Supplement: Supplementary file 1 [file 34891941]

| Table S1. Risk of bias assessment for NRCTs (ROBINS-I) | | | | | | | | | |
| --- | --- | --- | --- | --- | --- | --- | --- | --- | --- |
| Study | **Year** | **Confounding** | **Participants’ selection** | **Classification of interventions** | **Deviations from  intended intervention** | **Missing data** | **Measurement of outcomes** | **Selection of the reported result** | **Overall** |
| Jeyakumar | 2017 | Moderate | Serious | Moderate | Moderate | Low | Moderate | Low | Serious |
| Lalani | 2018 | Moderate | Serious | Moderate | Moderate | Low | Moderate | Low | Serious |
| Bilen | 2018 | Moderate | Serious | Low | Moderate | Low | Moderate | Low | Moderate |
| Zahoor | 2018 | Low | Moderate | Low | Moderate | Low | Moderate | Low | Moderate |
| Suzuki | 2019 | Low | Moderate | Low | Moderate | Low | Moderate | Low | Moderate |
| Ishihara | 2019 | Low | Moderate | Low | Moderate | Low | Moderate | Low | Moderate |
| Shirotake | 2019 | Low | Moderate | Low | Moderate | Low | Moderate | Low | Moderate |
| Takemura | 2020 | Low | Moderate | Low | Moderate | Low | Serious | Low | Moderate |
| Hinata | 2020 | Low | Moderate | Low | Moderate | Low | Moderate | Low | Moderate |
| Motzer | 2020 | Low | Low | Low | Low | Low | Low | Low | Low |
| Noguchi | 2020 | Low | Moderate | Low | Moderate | Low | Moderate | Low | Moderate |
| Simonaggio | 2020 | Moderate | Serious | Low | Moderate | Low | Serious | Low | Serious |
| Yamamoto | 2020 | Low | Moderate | Low | Moderate | Low | Serious | Low | Moderate |
| Roussel | 2021 | Low | Serious | Low | Moderate | Low | Moderate | Low | Moderate |
| Iinuma | 2021 | Low | Moderate | Moderate | Moderate | Low | Moderate | Low | Moderate |
| NRCTs: non-randomized comparative studies, ROBINS-I: Risk Of Bias In Non-Randomized Studies -of Interventions | | | | | | | | | |
